# Supplementary material for: Retrospective Cohort Study to Assess the Risk of Rabies in Biting Dogs, 2013–2015, Republic of Haiti
Source: PubMed Central journal article supplement (PMC6082081; doi:10.3390/tropicalmed2020014), 2017-06-12
Supplement: tropicalmed-02-00014-s001.pdf [file tropicalmed-02-00014-s001.pdf]

# Supplementary Materials Materials: Retrospective Cohort Study to Assess the Risk of Rabies in Biting Dogs, 2013–2015, Republic of Haiti

Alexandra M. Medley, Max Francois Millien, Jesse D. Blanton, Xiaoyue Ma, Pierre Augustin, Kelly Crowdis and Ryan M. Wallace

## Supplementary S1. HARSP Surveillance Form and Investigation Checklist.

Date of Notification: \_\_/\_\_/\_\_\_\_ Name \_\_\_\_\_ Animal ID: |\_|\_|\_|\_|\_|\_|\_|\_|\_|\_|

|                                                                                                                                                                                                                                                                                                                                                                                                                                                                                                                                                                                                                                                                                                                                                                                                                                                                                                                                                                                                |                                                                                                                                      |
|------------------------------------------------------------------------------------------------------------------------------------------------------------------------------------------------------------------------------------------------------------------------------------------------------------------------------------------------------------------------------------------------------------------------------------------------------------------------------------------------------------------------------------------------------------------------------------------------------------------------------------------------------------------------------------------------------------------------------------------------------------------------------------------------------------------------------------------------------------------------------------------------------------------------------------------------------------------------------------------------|--------------------------------------------------------------------------------------------------------------------------------------|
| <p>1. Reported From: <input type="checkbox"/> DELR → NSSS Number:  _ _ _ _ _ _ </p> <p><input type="checkbox"/> Health Department: _____</p> <p><input type="checkbox"/> Hospital: _____</p> <p><input type="checkbox"/> Vet Agent: _____</p> <p><input type="checkbox"/> Veterinarian</p> <p><input type="checkbox"/> Public</p> <p>2. Reason for report: <input type="checkbox"/> Human Exposure (bite or scratch) <input type="checkbox"/> Sick animal <input type="checkbox"/> Hit by car <input type="checkbox"/> Other _____</p> <p>3. Type of animal: <input type="checkbox"/> Dog <input type="checkbox"/> Cat <input type="checkbox"/> Goat <input type="checkbox"/> Pig <input type="checkbox"/> Mongoose <input type="checkbox"/> Other _____</p> <p>4. Was this animal: <input type="checkbox"/> Owned <input type="checkbox"/> Stray <input type="checkbox"/> Unknown</p> <p>5. Location of animal exposure: Department _____ Commune _____ Street _____</p> <p><b>NOTES:</b></p> | <p>Medical Contact Name: _____</p> <p>Phone Number: _____</p> <p>Patient Name: _____</p> <p>Age _____</p> <p>Phone Number: _____</p> |
|------------------------------------------------------------------------------------------------------------------------------------------------------------------------------------------------------------------------------------------------------------------------------------------------------------------------------------------------------------------------------------------------------------------------------------------------------------------------------------------------------------------------------------------------------------------------------------------------------------------------------------------------------------------------------------------------------------------------------------------------------------------------------------------------------------------------------------------------------------------------------------------------------------------------------------------------------------------------------------------------|--------------------------------------------------------------------------------------------------------------------------------------|

|                                                                                                                     |                                                                                                                              |
|---------------------------------------------------------------------------------------------------------------------|------------------------------------------------------------------------------------------------------------------------------|
| 6. Date of Investigation: _____                                                                                     | 7. Type of Investigation? <input type="checkbox"/> Owner Phone Consultation <input type="checkbox"/> In-Person Investigation |
| 8. How many people were bitten by the animal? _____ How many people were scratched by the animal? _____             |                                                                                                                              |
| 9. How many people already started rabies vaccine? _____ How many people did you refer for medical treatment? _____ |                                                                                                                              |

10. What other animals were bitten by this animal? How many?  Dog \_\_\_\_\_  Cat \_\_\_\_\_  Goat \_\_\_\_\_  Other \_\_\_\_\_

11. Was the animal located? **Yes**  Alive  Escaped capture  Dead, killed by owner  Dead, killed by public  
 Dead, killed by car  Dead, natural causes  Dead, unknown causes

**No**  Not found  Dead, killed by owner  Dead, killed by public  
 Dead, killed by car  Dead, natural causes  Dead, unknown causes

12. Where was animal located? Department/Commune \_\_\_\_\_

13. What is the animal's age?  Puppy  Junior  Adult  Senior  Unknown

14. What is the animal's sex?  Male  Female

15. Has the animal been vaccinated for rabies?  Yes, year: \_\_\_\_\_  Not vaccinated  Unknown

**NOTES:**

16. Signs of Disease:  Aggression  Biting  Hypersalivation  Paralyzed  Lethargy  Unknown

Other (specify) \_\_\_\_\_

17. Rabies Assessment:  Healthy  Sick, signs of rabies  Sick, not rabies  Dead

Other (specify) \_\_\_\_\_

18. Assessment Decision:  Quarantine  Euthanize  Dead  Other \_\_\_\_\_

Died, date \_\_\_\_\_  Euthanized  Natural Causes  Other

19. Quarantine results:  Healthy after 14 days

No  Animal was lost  Decomposed / Burned  
 Body discarded  Other

20. Was the animal submitted for testing?  Yes, date: \_\_\_\_\_

**NOT**

Day 5 follow up:

Day 10 follow up:

21. Date specimen received at lab: \_\_\_\_\_ 22. Lab ID Number: \_\_\_\_\_ 23. Date tested: \_\_\_\_\_

24. Test Results:  Positive  Negative  Inconclusive

Hospital notified, date \_\_\_\_\_

Health department notified, date \_\_\_\_\_

| <b>Investigation Checklist</b>                                                               |              |
|----------------------------------------------------------------------------------------------|--------------|
| <b>BEFORE DEPARTURE</b>                                                                      | <b>NOTES</b> |
| Call owner, conduct verbal interview (Form 1a)                                               |              |
| Check inventory                                                                              |              |
| Verify equipment is in working condition                                                     |              |
| Take necessary medications from the lock box                                                 |              |
| Report your investigation destination to a colleague                                         |              |
| Plan route                                                                                   |              |
| <b>UPON ARRIVAL</b>                                                                          | <b>NOTES</b> |
| Locate the owner or bite victim                                                              |              |
| Prevent crowds from gathering                                                                |              |
| Ask for other animals to be kept away                                                        |              |
| Locate the offending animal, if in the area                                                  |              |
| Plan Escape Route                                                                            |              |
| Develop plan                                                                                 |              |
| Does the animal need to be secured?                                                          |              |
| Does the animal require sedation?                                                            |              |
| Does the animal require euthanasia?                                                          |              |
| Ready your equipment                                                                         |              |
| Ready your medications                                                                       |              |
| Ensure the area around the animal is safe and people and other animals are out of harm's way |              |
| Secure the animal according to the plan developed                                            |              |
| Conduct investigation, complete the Form                                                     |              |
| Conduct appropriate education with owners, victim and community                              |              |
| Log Drugs Used in Log Book                                                                   |              |
| Ensure scene is clean, do not leave garbage or infectious materials                          |              |
| <b>UPON RETURN</b>                                                                           | <b>NOTES</b> |
| Process the animal for storage or testing                                                    |              |
| Incinerate the body and disposable supplies that were used                                   |              |
| Organize supplies and equipment                                                              |              |
| Return medications to lock box                                                               |              |
| Review investigation form, complete as necessary                                             |              |
| Store forms in secured drawer                                                                |              |

**Supplementary S2. Proportion of Surviving Dogs during 14-Day Rabies Quarantine.**

| <b>Days Until Death</b> | <b>% Rabies Positive in Quarantine Still Alive</b> | <b>% Case Negative in Quarantine Still Alive</b> | <b>% of All Case Negatives Still Alive</b> |
|-------------------------|----------------------------------------------------|--------------------------------------------------|--------------------------------------------|
| 0                       | 91.67                                              | 75                                               | 97.8                                       |
| 1                       | 66.67                                              | 66.67                                            | 97.65                                      |
| 2                       | 16.67                                              | 58.33                                            | 97.65                                      |
| 3                       | 0                                                  | 41.67                                            | 97.5                                       |
| 4                       | 0                                                  | 41.67                                            | 97.35                                      |
| 5                       | 0                                                  | 33.33                                            | 97.35                                      |
| 6                       | 0                                                  | 16.6                                             | 97.28                                      |
| 7                       | 0                                                  | 8.33                                             | 97.13                                      |
| 8                       | 0                                                  | 8.33                                             | 97.06                                      |
| 9                       | 0                                                  | 8.33                                             | 97.06                                      |
| 10                      | 0                                                  | 8.33                                             | 97.06                                      |
| 11                      | 0                                                  | 0                                                | 97.06                                      |
| 12                      | 0                                                  | 0                                                | 97.06                                      |
| 13                      | 0                                                  | 0                                                | 97.06                                      |
| 14                      | 0                                                  | 0                                                | 97.06                                      |
